# Supplementary material
Source: PubMed Central journal article supplement (PMC4686861)
Supplement: NIHMS744223-supplement-Supplementary_Table_S2.pdf [file NIHMS744223-supplement-Supplementary_Table_S2.pdf]

Table S2. Discrepant recommendations of cancer genomic tests between organizations, by order of statement issuance

| Test               | Purpose                                                                            | First recommendation statement |        |                       | Second recommendation statement |        |                       | Third recommendation statement |        |                       | Fourth recommendation statement |        |                       |       |
|--------------------|------------------------------------------------------------------------------------|--------------------------------|--------|-----------------------|---------------------------------|--------|-----------------------|--------------------------------|--------|-----------------------|---------------------------------|--------|-----------------------|-------|
|                    |                                                                                    | Year                           | Source | Category <sup>a</sup> | Year                            | Source | Category <sup>a</sup> | Year                           | Source | Category <sup>a</sup> | Year                            | Source | Category <sup>a</sup> |       |
| <b>BRAF</b>        | Pharmacogenomic for anti-EGFR therapy in colon cancer                              | 2011                           | NCCN   | 2                     | 2013                            | NCCN   | 2                     |                                |        |                       |                                 |        |                       |       |
|                    |                                                                                    |                                |        |                       |                                 | EGAPP  | 3                     |                                |        |                       |                                 |        |                       |       |
| <b>CYP2D6</b>      | Pharmacogenomic for tamoxifen use in breast cancer                                 | 2005                           | ASCO   | 3                     | 2010                            | NCAB   | 2                     |                                | 2011   | BCBS                  | 3                               |        |                       |       |
|                    |                                                                                    |                                |        |                       |                                 | ASCO   | 3                     |                                |        | AHS                   | 3                               |        |                       |       |
| <b>ERRC1</b>       | Prognostic / Pharmacogenomic use in NSCLC                                          | 2009                           | ASCO   | - / 3                 | 2011                            | NCCN   | - / 3                 |                                | 2013   | NCCN                  | 2 / 2                           |        |                       |       |
| <b>Oncotype DX</b> | Prognostic / Pharmacogenomic use in lymph node-negative, ER-positive breast cancer | 2007                           | ASCO   | 2 / 2                 | 2009                            | NACB   | 1 / 2                 |                                | 2011   | NCCN                  | 2 / 2                           | 2013   | NICE                  | 1 / 1 |
|                    |                                                                                    |                                |        |                       |                                 | EGAPP  | - / 3                 |                                |        |                       |                                 |        |                       |       |
| <b>RRM1</b>        | Prognostic / Pharmacogenomic use in NSCLC                                          | 2009                           | ASCO   | - / 3                 | 2010                            | NCCN   | 2 / 2                 |                                | 2011   | NCCN                  | 2 / 2                           |        |                       |       |
| <b>UGT1A1</b>      | Pharmacogenomic use for irinotecan dosing in colon cancer                          | 2009                           | EGAPP  | 3                     | 2010                            | NCAB   | 2                     |                                |        |                       |                                 |        |                       |       |

<sup>a</sup> The - symbol indicates that the corresponding organization did not comment on the tests' prognostic purpose.
