# Supplementary material
Source: PubMed Central journal article supplement (PMC4686861)
Supplement: NIHMS744223-supplement-Supplementary_Table_S3.pdf [file NIHMS744223-supplement-Supplementary_Table_S3.pdf]

Table S3. Dates of translational milestones for cancer genomic tests

| Cancer Type(s)             | Test                      | Purpose(s)                  | Discovery                    | First Human Study            | First Demonstration of Test (by purpose)                | First Recommendation Statement (by purpose) <sup>a</sup> | FDA Approval/Clearance |
|----------------------------|---------------------------|-----------------------------|------------------------------|------------------------------|---------------------------------------------------------|----------------------------------------------------------|------------------------|
| Acute lymphocytic leukemia | TPMT                      | Pharmacogenomic             | September 1980 <sup>22</sup> | September 1980 <sup>22</sup> | June 1999 <sup>33</sup>                                 | March 2011                                               | --                     |
| Acute myeloid leukemia     | CEBPA                     | Prognostic                  | January 1997 <sup>34</sup>   | March 2001 <sup>35</sup>     | October 2002 <sup>36</sup>                              | November 2011                                            | --                     |
|                            | FLT3-ITD                  | Prognostic                  | December 1996 <sup>37</sup>  | December 1996 <sup>37</sup>  | May 1999 <sup>38</sup>                                  | November 2011                                            | --                     |
|                            | FLT3-TKD                  | Prognostic                  | April 2001 <sup>39</sup>     | April 2001 <sup>39</sup>     | April 2001 <sup>39</sup>                                | November 2011                                            | --                     |
|                            | IDH1                      | Prognostic                  | September 2009 <sup>40</sup> | September 2009 <sup>40</sup> | May 2010 <sup>41</sup>                                  | November 2011                                            | --                     |
|                            | IDH2 c.515G>A p.R172K     | Prognostic                  | May 2010 <sup>41</sup>       | May 2010 <sup>41</sup>       | May 2010 <sup>41</sup>                                  | November 2011                                            | --                     |
|                            | IDH2 (codon 140)          | Prognostic                  | March 2010 <sup>42</sup>     | March 2010 <sup>42</sup>     | May 2010 <sup>41</sup>                                  | November 2011                                            | --                     |
|                            | KIT                       | Prognostic                  | October 1989 <sup>43</sup>   | December 1991 <sup>44</sup>  | August 2006 <sup>45</sup>                               | November 2011                                            | --                     |
|                            | MLL-PTD                   | Prognostic                  | December 1991 <sup>46</sup>  | May 1996 <sup>47</sup>       | May 2000 <sup>48</sup>                                  | November 2011                                            | --                     |
|                            | NPM1                      | Prognostic                  | January 1996 <sup>49</sup>   | January 1996 <sup>49</sup>   | December 2005 <sup>50</sup>                             | November 2011                                            | --                     |
|                            | RUNX1                     | Prognostic                  | December 1991 <sup>51</sup>  | December 1991 <sup>51</sup>  | November 1996 <sup>52</sup>                             | November 2011                                            | --                     |
| Breast cancer              | WT1                       | Prognostic                  | May 1992 <sup>53</sup>       | May 1992 <sup>53</sup>       | November 1994 <sup>54</sup>                             | November 2011                                            | --                     |
|                            | H:I ratio (HOXB13:IL17BR) | Prognostic                  | June 2004 <sup>55</sup>      | June 2004 <sup>55</sup>      | October 2006 <sup>56</sup>                              | January 2009                                             | --                     |
|                            | CYP2D6                    | Pharmacogenomic             | January 1990 <sup>57</sup>   | January 1990 <sup>57</sup>   | January 2005 <sup>58</sup>                              | January 2005                                             | Cleared December 2004  |
|                            | MammaPrint                | Prognostic                  | January 2002 <sup>23</sup>   | January 2002 <sup>23</sup>   | December 2002 <sup>59</sup>                             | January 2009                                             | Cleared February 2007  |
|                            | Oncotype DX               | Prognostic; Pharmacogenomic | December 2005 <sup>60</sup>  | December 2005 <sup>60</sup>  | December 2004 <sup>61</sup> ; August 2006 <sup>62</sup> | November 2007; November 2007                             | --                     |

|                              |                                 |                                                    |                               |                               |                                                                                                           |                                                          |                     |
|------------------------------|---------------------------------|----------------------------------------------------|-------------------------------|-------------------------------|-----------------------------------------------------------------------------------------------------------|----------------------------------------------------------|---------------------|
| Breast and Ovarian cancer    | BRCA                            | Screening                                          | December 1990 <sup>63</sup>   | December 1990 <sup>63</sup>   | May 1997 <sup>64</sup>                                                                                    | May 2004                                                 | --                  |
| Chronic lymphocytic leukemia | TP53                            | Pharmacogenomic                                    | September 1989 <sup>65</sup>  | June 1991 <sup>66</sup>       | December 1993 <sup>67</sup>                                                                               | May 2004                                                 | Cleared August 2011 |
| Colon cancer                 | BRAF                            | Screening; Prognostic; Pharmacogenomic             | June 2002 <sup>68</sup>       | June 2002 <sup>68</sup>       | January 2004 <sup>69</sup> ; July 2005 <sup>70</sup> ; December 2008 <sup>71</sup>                        | January 2009; November 2011; November 2011               | --                  |
|                              | ColoPrint                       | Prognostic                                         | January 2011 <sup>72</sup>    | January 2011 <sup>72</sup>    | January 2011 <sup>72</sup>                                                                                | November 2011                                            | --                  |
|                              | Oncotype DX Colon               | Prognostic                                         | August 2007 <sup>73</sup>     | August 2007 <sup>73</sup>     | November 2011 <sup>74</sup>                                                                               | November 2011                                            | --                  |
| Colorectal cancer            | 18q LOH/DCC                     | Prognostic; Pharmacogenomic                        | January 1990 <sup>75</sup>    | January 1990 <sup>75</sup>    | December 1996 <sup>76</sup> ; July 2004 <sup>77</sup>                                                     | February 2006; February 2006                             | --                  |
|                              | KRAS (except c.38G>A (p.G13D))  | Pharmacogenomic                                    | March 1983 <sup>78</sup>      | June 1984 <sup>79</sup>       | April 2006 <sup>80</sup>                                                                                  | February 2009                                            | Approved July 2012  |
|                              | Lynch syndrome testing, MMR/MSI | Screening; Diagnostic; Prognostic; Pharmacogenomic | May 1993 <sup>81</sup>        | May 1993 <sup>81</sup>        | April 1996 <sup>82</sup> ; April 1996 <sup>82</sup> ; June 1996 <sup>83</sup> ; August 2001 <sup>84</sup> | January 2009; January 2009; November 2006; November 2006 | --                  |
|                              | NRAS                            | Pharmacogenomic                                    | September 1988 <sup>85</sup>  | September 1988 <sup>85</sup>  | August 2010 <sup>86</sup>                                                                                 | February 2013                                            | --                  |
| Glioma                       | PIK3CA                          | Pharmacogenomic                                    | April 2004 <sup>87</sup>      | April 2004 <sup>87</sup>      | March 2008 <sup>88</sup>                                                                                  | February 2013                                            |                     |
|                              | PTEN                            | Pharmacogenomic                                    | January 2000 <sup>89</sup>    | January 2000 <sup>89</sup>    | October 2007 <sup>90</sup>                                                                                | February 2013                                            | --                  |
|                              | TP53                            | Prognostic; Pharmacogenomic                        | August 1984 <sup>91</sup>     | August 1984 <sup>91</sup>     | September 1992 <sup>92</sup> ; June 1996 <sup>93</sup>                                                    | November 2006; November 2006                             | Cleared April 2012  |
|                              | UGT1A1                          | Pharmacogenomic                                    | October 1997 <sup>94</sup>    | October 1997 <sup>94</sup>    | December 2000 <sup>95</sup>                                                                               | January 2010                                             | Cleared August 2005 |
|                              | 1p/19q                          | Diagnostic; Prognostic                             | April 1994 <sup>96</sup>      | April 1994 <sup>96</sup>      | July 1999 <sup>97</sup> ; October 1998 <sup>98</sup>                                                      | November 2011; November 2011                             | --                  |
|                              | G-CIMP                          | Prognostic                                         | February 2000 <sup>99</sup>   | February 2000 <sup>99</sup>   | May 2010 <sup>100</sup>                                                                                   | November 2011                                            | --                  |
|                              | IDH (IDH1) c. 395               | Diagnostic; Prognostic                             | September 2008 <sup>101</sup> | September 2008 <sup>101</sup> | December 2009 <sup>102</sup> ; February 2009 <sup>103</sup>                                               | November 2011; November 2011                             | --                  |

|                                |                    |                             |                               |                               |                                                               |                              |                        |
|--------------------------------|--------------------|-----------------------------|-------------------------------|-------------------------------|---------------------------------------------------------------|------------------------------|------------------------|
|                                | G>A p.R132H (IDH2) |                             |                               |                               |                                                               |                              |                        |
| Glioma (Glioblastoma)          | MGMT               | Prognostic; Pharmacogenomic | September 1991 <sup>104</sup> | September 1991 <sup>104</sup> | October 1998 <sup>105</sup> ; November 2000 <sup>106</sup>    | February 2010; November 2011 | --                     |
| Glioma (Pilocytic astrocytoma) | BRAF fusion        | Diagnostic                  | November 2008 <sup>107</sup>  | November 2008 <sup>107</sup>  | August 2010 <sup>108</sup>                                    | November 2011                | --                     |
| Melanoma                       | BRAF               | Pharmacogenomic             | June 2002 <sup>68</sup>       | June 2002 <sup>68</sup>       | September 2010 <sup>109</sup>                                 | November 2011                | Approved August 2011   |
| Non-small cell lung cancer     | ALK                | Pharmacogenomic             | August 2007 <sup>110</sup>    | August 2007 <sup>110</sup>    | October 2010 <sup>111</sup>                                   | November 2011                | Approved August 2011   |
|                                | EGFR               | Pharmacogenomic             | August 1985 <sup>112</sup>    | August 1985 <sup>112</sup>    | May 2004 <sup>113</sup>                                       | July 2010                    | Approved May 2013      |
|                                | ERCC1              | Prognostic; Pharmacogenomic | July 2002 <sup>114</sup>      | July 2002 <sup>114</sup>      | July 2002 <sup>114</sup> ; September 2006 <sup>115</sup>      | November 2013; November 2013 | --                     |
|                                | KRAS               | Prognostic; Pharmacogenomic | June 1982 <sup>116</sup>      | February 1984 <sup>117</sup>  | August 1990 <sup>118</sup> ; September 2005 <sup>119</sup>    | November 2011; October 2013  | --                     |
|                                | ROS1               | Pharmacogenomic             | September 1984 <sup>120</sup> | September 1984 <sup>120</sup> | September 2012 <sup>121</sup>                                 | September 2013               | --                     |
|                                | RRM1               | Prognostic; Pharmacogenomic | November 1997 <sup>122</sup>  | September 1999 <sup>123</sup> | May 2004 <sup>124</sup> ; June 2003 <sup>125</sup>            | July 2010; July 2010         | --                     |
| Prostate cancer                | PCA3 (DD3)         | Diagnostic                  | December 1999 <sup>126</sup>  | December 1999 <sup>126</sup>  | May 2002 <sup>127</sup>                                       | November 2011                | Approved February 2012 |
| Thyroid cancer (medullary)     | RET                | Screening; Diagnostic       | October 1990 <sup>128</sup>   | October 1990 <sup>128</sup>   | September 1994 <sup>129</sup> ; September 1994 <sup>129</sup> | June 2009; June 2009         | --                     |
| Various <sup>b</sup>           | DPYD               | Pharmacogenomic             | September 1994 <sup>130</sup> | August 1996 <sup>131</sup>    | September 2001 <sup>132</sup>                                 | August 2010                  | --                     |
|                                | TYMS               | Pharmacogenomic             | May 1984 <sup>133</sup>       | March 1987 <sup>134</sup>     | January 2001 <sup>135</sup>                                   | August 2010                  | --                     |

<sup>a</sup> earliest recommendation statement of the same recommendation type (e.g. positive or negative) as the most recent recommendation statement

<sup>b</sup> includes colorectal cancer, other gastrointestinal cancer, head and neck, and breast cancer

### Supplementary References

33. McLeod HL, Coulthard S, Thomas AE, et al. Analysis of thiopurine methyltransferase variant alleles in childhood acute lymphoblastic leukaemia. *Br J Haematol*. Jun 1999;105(3):696-700.
34. Zhang DE, Zhang P, Wang ND, Hetherington CJ, Darlington GJ, Tenen DG. Absence of granulocyte colony-stimulating factor signaling and neutrophil development in CCAAT enhancer binding protein alpha-deficient mice. *Proc Natl Acad Sci U S A*. Jan 21 1997;94(2):569-574.
35. Pabst T, Mueller BU, Zhang P, et al. Dominant-negative mutations of CEBPA, encoding CCAAT/enhancer binding protein-alpha (C/EBPalpha), in acute myeloid leukemia. *Nat Genet*. Mar 2001;27(3):263-270.
36. Preudhomme C, Sagot C, Boissel N, et al. Favorable prognostic significance of CEBPA mutations in patients with de novo acute myeloid leukemia: a study from the Acute Leukemia French Association (ALFA). *Blood*. Oct 15 2002;100(8):2717-2723.
37. Nakao M, Yokota S, Iwai T, et al. Internal tandem duplication of the flt3 gene found in acute myeloid leukemia. *Leukemia*. Dec 1996;10(12):1911-1918.
38. Kiyoi H, Naoe T, Nakano Y, et al. Prognostic implication of FLT3 and N-RAS gene mutations in acute myeloid leukemia. *Blood*. May 1 1999;93(9):3074-3080.
39. Yamamoto Y, Kiyoi H, Nakano Y, et al. Activating mutation of D835 within the activation loop of FLT3 in human hematologic malignancies. *Blood*. Apr 15 2001;97(8):2434-2439.
40. Mardis ER, Ding L, Dooling DJ, et al. Recurring mutations found by sequencing an acute myeloid leukemia genome. *N Engl J Med*. Sep 10 2009;361(11):1058-1066.
41. Marcucci G, Maharry K, Wu YZ, et al. IDH1 and IDH2 gene mutations identify novel molecular subsets within de novo cytogenetically normal acute myeloid leukemia: a Cancer and Leukemia Group B study. *J Clin Oncol*. May 10 2010;28(14):2348-2355.

42. Ward PS, Patel J, Wise DR, et al. The common feature of leukemia-associated IDH1 and IDH2 mutations is a neomorphic enzyme activity converting alpha-ketoglutarate to 2-hydroxyglutarate. *Cancer Cell*. Mar 16 2010;17(3):225-234.
43. Wang C, Curtis JE, Geissler EN, McCulloch EA, Minden MD. The expression of the proto-oncogene C-kit in the blast cells of acute myeloblastic leukemia. *Leukemia*. Oct 1989;3(10):699-702.
44. Ikeda H, Kanakura Y, Tamaki T, et al. Expression and functional role of the proto-oncogene c-kit in acute myeloblastic leukemia cells. *Blood*. Dec 1 1991;78(11):2962-2968.
45. Paschka P, Marcucci G, Ruppert AS, et al. Adverse prognostic significance of KIT mutations in adult acute myeloid leukemia with inv(16) and t(8;21): a Cancer and Leukemia Group B Study. *J Clin Oncol*. Aug 20 2006;24(24):3904-3911.
46. Ziemin-van der Poel S, McCabe NR, Gill HJ, et al. Identification of a gene, MLL, that spans the breakpoint in 11q23 translocations associated with human leukemias. *Proc Natl Acad Sci U S A*. Dec 1 1991;88(23):10735-10739.
47. Yu M, Honoki K, Andersen J, Paietta E, Nam DK, Yunis JJ. MLL tandem duplication and multiple splicing in adult acute myeloid leukemia with normal karyotype. *Leukemia*. May 1996;10(5):774-780.
48. Schnittger S, Kinkelin U, Schoch C, et al. Screening for MLL tandem duplication in 387 unselected patients with AML identify a prognostically unfavorable subset of AML. *Leukemia*. May 2000;14(5):796-804.
49. Yoneda-Kato N, Look AT, Kirstein MN, et al. The t(3;5)(q25.1;q34) of myelodysplastic syndrome and acute myeloid leukemia produces a novel fusion gene, NPM-MLF1. *Oncogene*. Jan 18 1996;12(2):265-275.
50. Dohner K, Schlenk RF, Habdank M, et al. Mutant nucleophosmin (NPM1) predicts favorable prognosis in younger adults with acute myeloid leukemia and normal cytogenetics: interaction with other gene mutations. *Blood*. Dec 1 2005;106(12):3740-3746.

51. Miyoshi H, Shimizu K, Kozu T, Maseki N, Kaneko Y, Ohki M. t(8;21) breakpoints on chromosome 21 in acute myeloid leukemia are clustered within a limited region of a single gene, AML1. *Proc Natl Acad Sci U S A*. Dec 1 1991;88(23):10431-10434.
52. Tobal K, Yin JA. Monitoring of minimal residual disease by quantitative reverse transcriptase-polymerase chain reaction for AML1-MTG8 transcripts in AML-M2 with t(8; 21). *Blood*. Nov 15 1996;88(10):3704-3709.
53. Miwa H, Beran M, Saunders GF. Expression of the Wilms' tumor gene (WT1) in human leukemias. *Leukemia*. May 1992;6(5):405-409.
54. Inoue K, Sugiyama H, Ogawa H, et al. WT1 as a new prognostic factor and a new marker for the detection of minimal residual disease in acute leukemia. *Blood*. Nov 1 1994;84(9):3071-3079.
55. Ma XJ, Wang Z, Ryan PD, et al. A two-gene expression ratio predicts clinical outcome in breast cancer patients treated with tamoxifen. *Cancer Cell*. Jun 2004;5(6):607-616.
56. Ma XJ, Hilsenbeck SG, Wang W, et al. The HOXB13:IL17BR expression index is a prognostic factor in early-stage breast cancer. *J Clin Oncol*. Oct 1 2006;24(28):4611-4619.
57. Pontin JE, Hamed H, Fentiman IS, Idle JR. Cytochrome P450db1 phenotypes in malignant and benign breast disease. *Eur J Cancer*. 1990;26(7):790-792.
58. Wegman P, Vainikka L, Stal O, et al. Genotype of metabolic enzymes and the benefit of tamoxifen in postmenopausal breast cancer patients. *Breast Cancer Res*. 2005;7(3):R284-290.
59. van de Vijver MJ, He YD, van't Veer LJ, et al. A gene-expression signature as a predictor of survival in breast cancer. *N Engl J Med*. Dec 19 2002;347(25):1999-2009.
60. Cobleigh MA, Tabesh B, Bitterman P, et al. Tumor gene expression and prognosis in breast cancer patients with 10 or more positive lymph nodes. *Clin Cancer Res*. Dec 15 2005;11(24 Pt 1):8623-8631.

61. Paik S, Shak S, Tang G, et al. A multigene assay to predict recurrence of tamoxifen-treated, node-negative breast cancer. *N Engl J Med*. Dec 30 2004;351(27):2817-2826.
62. Paik S, Tang G, Shak S, et al. Gene expression and benefit of chemotherapy in women with node-negative, estrogen receptor-positive breast cancer. *J Clin Oncol*. Aug 10 2006;24(23):3726-3734.
63. Hall JM, Lee MK, Newman B, et al. Linkage of early-onset familial breast cancer to chromosome 17q21. *Science*. Dec 21 1990;250(4988):1684-1689.
64. Krainer M, Silva-Arrieta S, FitzGerald MG, et al. Differential contributions of BRCA1 and BRCA2 to early-onset breast cancer. *N Engl J Med*. May 15 1997;336(20):1416-1421.
65. Lavigueur A, Maltby V, Mock D, Rossant J, Pawson T, Bernstein A. High incidence of lung, bone, and lymphoid tumors in transgenic mice overexpressing mutant alleles of the p53 oncogene. *Mol Cell Biol*. Sep 1989;9(9):3982-3991.
66. Gaidano G, Ballerini P, Gong JZ, et al. p53 mutations in human lymphoid malignancies: association with Burkitt lymphoma and chronic lymphocytic leukemia. *Proc Natl Acad Sci U S A*. Jun 15 1991;88(12):5413-5417.
67. el Rouby S, Thomas A, Costin D, et al. p53 gene mutation in B-cell chronic lymphocytic leukemia is associated with drug resistance and is independent of MDR1/MDR3 gene expression. *Blood*. Dec 1 1993;82(11):3452-3459.
68. Davies H, Bignell GR, Cox C, et al. Mutations of the BRAF gene in human cancer. *Nature*. Jun 27 2002;417(6892):949-954.
69. Deng G, Bell I, Crawley S, et al. BRAF mutation is frequently present in sporadic colorectal cancer with methylated hMLH1, but not in hereditary nonpolyposis colorectal cancer. *Clin Cancer Res*. Jan 1 2004;10(1 Pt 1):191-195.
70. Samowitz WS, Sweeney C, Herrick J, et al. Poor survival associated with the BRAF V600E mutation in microsatellite-stable colon cancers. *Cancer Res*. Jul 15 2005;65(14):6063-6069.

71. Di Nicolantonio F, Martini M, Molinari F, et al. Wild-type BRAF is required for response to panitumumab or cetuximab in metastatic colorectal cancer. *J Clin Oncol*. Dec 10 2008;26(35):5705-5712.
72. Salazar R, Roepman P, Capella G, et al. Gene expression signature to improve prognosis prediction of stage II and III colorectal cancer. *J Clin Oncol*. Jan 1 2011;29(1):17-24.
73. Clark-Langone KM, Wu JY, Sangli C, et al. Biomarker discovery for colon cancer using a 761 gene RT-PCR assay. *BMC Genomics*. 2007;8:279.
74. Gray RG, Quirke P, Handley K, et al. Validation study of a quantitative multigene reverse transcriptase-polymerase chain reaction assay for assessment of recurrence risk in patients with stage II colon cancer. *J Clin Oncol*. Dec 10 2011;29(35):4611-4619.
75. Fearon ER, Cho KR, Nigro JM, et al. Identification of a chromosome 18q gene that is altered in colorectal cancers. *Science*. Jan 5 1990;247(4938):49-56.
76. Shibata D, Reale MA, Lavin P, et al. The DCC protein and prognosis in colorectal cancer. *N Engl J Med*. Dec 5 1996;335(23):1727-1732.
77. Gal R, Sadikov E, Sulkes J, Klein B, Koren R. Deleted in colorectal cancer protein expression as a possible predictor of response to adjuvant chemotherapy in colorectal cancer patients. *Dis Colon Rectum*. Jul 2004;47(7):1216-1224.
78. McCoy MS, Toole JJ, Cunningham JM, Chang EH, Lowy DR, Weinberg RA. Characterization of a human colon/lung carcinoma oncogene. *Nature*. Mar 3 1983;302(5903):79-81.
79. Spandidos DA, Kerr IB. Elevated expression of the human ras oncogene family in premalignant and malignant tumours of the colorectum. *Br J Cancer*. Jun 1984;49(6):681-688.
80. Lievre A, Bachet JB, Le Corre D, et al. KRAS mutation status is predictive of response to cetuximab therapy in colorectal cancer. *Cancer Res*. Apr 15 2006;66(8):3992-3995.
81. Thibodeau SN, Bren G, Schaid D. Microsatellite instability in cancer of the proximal colon. *Science*. May 7 1993;260(5109):816-819.



82. Vasen HF, Wijnen JT, Menko FH, et al. Cancer risk in families with hereditary nonpolyposis colorectal cancer diagnosed by mutation analysis. *Gastroenterology*. Apr 1996;110(4):1020-1027.
83. Bubb VJ, Curtis LJ, Cunningham C, et al. Microsatellite instability and the role of hMSH2 in sporadic colorectal cancer. *Oncogene*. Jun 20 1996;12(12):2641-2649.
84. Elsaleh H, Iacopetta B. Microsatellite instability is a predictive marker for survival benefit from adjuvant chemotherapy in a population-based series of stage III colorectal carcinoma. *Clin Colorectal Cancer*. Aug 2001;1(2):104-109.
85. Vogelstein B, Fearon ER, Hamilton SR, et al. Genetic alterations during colorectal-tumor development. *N Engl J Med*. Sep 1 1988;319(9):525-532.
86. De Roock W, Claes B, Bernasconi D, et al. Effects of KRAS, BRAF, NRAS, and PIK3CA mutations on the efficacy of cetuximab plus chemotherapy in chemotherapy-refractory metastatic colorectal cancer: a retrospective consortium analysis. *Lancet Oncol*. Aug 2010;11(8):753-762.
87. Samuels Y, Wang Z, Bardelli A, et al. High frequency of mutations of the PIK3CA gene in human cancers. *Science*. Apr 23 2004;304(5670):554.
88. Jhawer M, Goel S, Wilson AJ, et al. PIK3CA mutation/PTEN expression status predicts response of colon cancer cells to the epidermal growth factor receptor inhibitor cetuximab. *Cancer Res*. Mar 15 2008;68(6):1953-1961.
89. Guanti G, Resta N, Simone C, et al. Involvement of PTEN mutations in the genetic pathways of colorectal cancerogenesis. *Hum Mol Genet*. Jan 22 2000;9(2):283-287.
90. Frattini M, Saletti P, Romagnani E, et al. PTEN loss of expression predicts cetuximab efficacy in metastatic colorectal cancer patients. *Br J Cancer*. Oct 22 2007;97(8):1139-1145.
91. Crawford LV, Pim DC, Lamb P. The cellular protein p53 in human tumours. *Mol Biol Med*. Aug 1984;2(4):261-272.
92. Starzynska T, Bromley M, Ghosh A, Stern PL. Prognostic significance of p53 overexpression in gastric and colorectal carcinoma. *Br J Cancer*. Sep 1992;66(3):558-562.

93. Hamada M, Fujiwara T, Hizuta A, et al. The p53 gene is a potent determinant of chemosensitivity and radiosensitivity in gastric and colorectal cancers. *J Cancer Res Clin Oncol.* 1996;122(6):360-365.
94. Wasserman E, Myara A, Lokiec F, et al. Severe CPT-11 toxicity in patients with Gilbert's syndrome: two case reports. *Ann Oncol.* Oct 1997;8(10):1049-1051.
95. Ando Y, Saka H, Ando M, et al. Polymorphisms of UDP-glucuronosyltransferase gene and irinotecan toxicity: a pharmacogenetic analysis. *Cancer Res.* Dec 15 2000;60(24):6921-6926.
96. Reifenberger J, Reifenberger G, Liu L, James CD, Wechsler W, Collins VP. Molecular genetic analysis of oligodendroglial tumors shows preferential allelic deletions on 19q and 1p. *Am J Pathol.* Nov 1994;145(5):1175-1190.
97. Smith JS, Alderete B, Minn Y, et al. Localization of common deletion regions on 1p and 19q in human gliomas and their association with histological subtype. *Oncogene.* Jul 15 1999;18(28):4144-4152.
98. Cairncross JG, Ueki K, Zlatescu MC, et al. Specific genetic predictors of chemotherapeutic response and survival in patients with anaplastic oligodendrogliomas. *J Natl Cancer Inst.* Oct 7 1998;90(19):1473-1479.
99. Costello JF, Fruhwald MC, Smiraglia DJ, et al. Aberrant CpG-island methylation has non-random and tumour-type-specific patterns. *Nat Genet.* Feb 2000;24(2):132-138.
100. Noushmehr H, Weisenberger DJ, Diefes K, et al. Identification of a CpG island methylator phenotype that defines a distinct subgroup of glioma. *Cancer Cell.* May 18 2010;17(5):510-522.
101. Parsons DW, Jones S, Zhang X, et al. An integrated genomic analysis of human glioblastoma multiforme. *Science.* Sep 26 2008;321(5897):1807-1812.
102. Horbinski C, Kofler J, Kelly LM, Murdoch GH, Nikiforova MN. Diagnostic use of IDH1/2 mutation analysis in routine clinical testing of formalin-fixed, paraffin-embedded glioma tissues. *J Neuropathol Exp Neurol.* Dec 2009;68(12):1319-1325.

103. Yan H, Parsons DW, Jin G, et al. IDH1 and IDH2 mutations in gliomas. *N Engl J Med*. Feb 19 2009;360(8):765-773.
104. Ostrowski LE, von Wronski MA, Bigner SH, et al. Expression of O6-methylguanine-DNA methyltransferase in malignant human glioma cell lines. *Carcinogenesis*. Sep 1991;12(9):1739-1744.
105. Jaeckle KA, Eyre HJ, Townsend JJ, et al. Correlation of tumor O6 methylguanine-DNA methyltransferase levels with survival of malignant astrocytoma patients treated with bis-chloroethylnitrosourea: a Southwest Oncology Group study. *J Clin Oncol*. Oct 1998;16(10):3310-3315.
106. Esteller M, Garcia-Foncillas J, Andion E, et al. Inactivation of the DNA-repair gene MGMT and the clinical response of gliomas to alkylating agents. *N Engl J Med*. Nov 9 2000;343(19):1350-1354.
107. Jones DT, Kocialkowski S, Liu L, et al. Tandem duplication producing a novel oncogenic BRAF fusion gene defines the majority of pilocytic astrocytomas. *Cancer Res*. Nov 1 2008;68(21):8673-8677.
108. Lawson AR, Tatevossian RG, Phipps KP, et al. RAF gene fusions are specific to pilocytic astrocytoma in a broad paediatric brain tumour cohort. *Acta Neuropathol*. Aug 2010;120(2):271-273.
109. Bollag G, Hirth P, Tsai J, et al. Clinical efficacy of a RAF inhibitor needs broad target blockade in BRAF-mutant melanoma. *Nature*. Sep 30 2010;467(7315):596-599.
110. Soda M, Choi YL, Enomoto M, et al. Identification of the transforming EML4-ALK fusion gene in non-small-cell lung cancer. *Nature*. Aug 2 2007;448(7153):561-566.
111. Kwak EL, Bang YJ, Camidge DR, et al. Anaplastic lymphoma kinase inhibition in non-small-cell lung cancer. *N Engl J Med*. Oct 28 2010;363(18):1693-1703.
112. Hunts J, Ueda M, Ozawa S, Abe O, Pastan I, Shimizu N. Hyperproduction and gene amplification of the epidermal growth factor receptor in squamous cell carcinomas. *Jpn J Cancer Res*. Aug 1985;76(8):663-666.

113. Lynch TJ, Bell DW, Sordella R, et al. Activating mutations in the epidermal growth factor receptor underlying responsiveness of non-small-cell lung cancer to gefitinib. *N Engl J Med*. May 20 2004;350(21):2129-2139.
114. Lord RV, Brabender J, Gandara D, et al. Low ERCC1 expression correlates with prolonged survival after cisplatin plus gemcitabine chemotherapy in non-small cell lung cancer. *Clin Cancer Res*. Jul 2002;8(7):2286-2291.
115. Olausson KA, Dunant A, Fouret P, et al. DNA repair by ERCC1 in non-small-cell lung cancer and cisplatin-based adjuvant chemotherapy. *N Engl J Med*. Sep 7 2006;355(10):983-991.
116. Der CJ, Krontiris TG, Cooper GM. Transforming genes of human bladder and lung carcinoma cell lines are homologous to the ras genes of Harvey and Kirsten sarcoma viruses. *Proc Natl Acad Sci U S A*. Jun 1982;79(11):3637-3640.
117. Santos E, Martin-Zanca D, Reddy EP, Pierotti MA, Della Porta G, Barbacid M. Malignant activation of a K-ras oncogene in lung carcinoma but not in normal tissue of the same patient. *Science*. Feb 17 1984;223(4637):661-664.
118. Slebos RJ, Kibbelaar RE, Dalesio O, et al. K-ras oncogene activation as a prognostic marker in adenocarcinoma of the lung. *N Engl J Med*. Aug 30 1990;323(9):561-565.
119. Eberhard DA, Johnson BE, Amler LC, et al. Mutations in the epidermal growth factor receptor and in KRAS are predictive and prognostic indicators in patients with non-small-cell lung cancer treated with chemotherapy alone and in combination with erlotinib. *J Clin Oncol*. Sep 1 2005;23(25):5900-5909.
120. Fasano O, Birnbaum D, Edlund L, Fogh J, Wigler M. New human transforming genes detected by a tumorigenicity assay. *Mol Cell Biol*. Sep 1984;4(9):1695-1705.
121. Davies KD, Le AT, Theodoro MF, et al. Identifying and targeting ROS1 gene fusions in non-small cell lung cancer. *Clin Cancer Res*. Sep 1 2012;18(17):4570-4579.

122. Fan H, Huang A, Villegas C, Wright JA. The R1 component of mammalian ribonucleotide reductase has malignancy-suppressing activity as demonstrated by gene transfer experiments. *Proc Natl Acad Sci U S A*. Nov 25 1997;94(24):13181-13186.
123. Pitterle DM, Kim YC, Jolicoeur EM, Cao Y, O'Briant KC, Bepler G. Lung cancer and the human gene for ribonucleotide reductase subunit M1 (RRM1). *Mamm Genome*. Sep 1999;10(9):916-922.
124. Bepler G, Sharma S, Cantor A, et al. RRM1 and PTEN as prognostic parameters for overall and disease-free survival in patients with non-small-cell lung cancer. *J Clin Oncol*. May 15 2004;22(10):1878-1885.
125. Rosell R, Scagliotti G, Danenberg KD, et al. Transcripts in pretreatment biopsies from a three-arm randomized trial in metastatic non-small-cell lung cancer. *Oncogene*. Jun 5 2003;22(23):3548-3553.
126. Bussemakers MJ, van Bokhoven A, Verhaegh GW, et al. DD3: a new prostate-specific gene, highly overexpressed in prostate cancer. *Cancer Res*. Dec 1 1999;59(23):5975-5979.
127. de Kok JB, Verhaegh GW, Roelofs RW, et al. DD3(PCA3), a very sensitive and specific marker to detect prostate tumors. *Cancer Res*. May 1 2002;62(9):2695-2698.
128. Santoro M, Rosati R, Grieco M, et al. The ret proto-oncogene is consistently expressed in human pheochromocytomas and thyroid medullary carcinomas. *Oncogene*. Oct 1990;5(10):1595-1598.
129. Wells SA, Jr., Chi DD, Toshima K, et al. Predictive DNA testing and prophylactic thyroidectomy in patients at risk for multiple endocrine neoplasia type 2A. *Ann Surg*. Sep 1994;220(3):237-247; discussion 247-250.
130. Yokota H, Fernandez-Salguero P, Furuya H, et al. cDNA cloning and chromosome mapping of human dihydropyrimidine dehydrogenase, an enzyme associated with 5-fluorouracil toxicity and congenital thymine uraciluria. *J Biol Chem*. Sep 16 1994;269(37):23192-23196.

131. Wei X, McLeod HL, McMurrough J, Gonzalez FJ, Fernandez-Salguero P. Molecular basis of the human dihydropyrimidine dehydrogenase deficiency and 5-fluorouracil toxicity. *J Clin Invest.* Aug 1 1996;98(3):610-615.
132. Raida M, Schwabe W, Hausler P, et al. Prevalence of a common point mutation in the dihydropyrimidine dehydrogenase (DPD) gene within the 5'-splice donor site of intron 14 in patients with severe 5-fluorouracil (5-FU)- related toxicity compared with controls. *Clin Cancer Res.* Sep 2001;7(9):2832-2839.
133. Takeishi K, Ayusawa D, Kaneda S, Shimizu K, Seno T. Molecular cloning of genomic DNA segments partially coding for human thymidylate synthase from the mouse cell transformant. *J Biochem.* May 1984;95(5):1477-1483.
134. Clark JL, Berger SH, Mittelman A, Berger FG. Thymidylate synthase gene amplification in a colon tumor resistant to fluoropyrimidine chemotherapy. *Cancer Treat Rep.* Mar 1987;71(3):261-265.
135. Pullarkat ST, Stoehlmacher J, Ghaderi V, et al. Thymidylate synthase gene polymorphism determines response and toxicity of 5-FU chemotherapy. *Pharmacogenomics J.* 2001;1(1):65-70.
